# Supplementary material for: Structural effects of oxidation on sugars: glucose as a precursor of gluconolactone and glucuronolactone
Source: Royal Society of Chemistry journal article supplement (doi:10.1039/d4cc00735b), 2024-01-01
Supplement: d4cc00735b1.pdf [file d4cc00735b1.pdf]

# Structural effects of oxidation on sugars: Glucose as a precursor of gluconolactone and glucuronolactone

Maidier Parra-Santamaria<sup>1, †</sup>, Aran Insausti<sup>2, †</sup>, Elena R. Alonso<sup>3</sup>, Francisco J. Basterretxea<sup>4</sup> and Emilio J. Cocinero<sup>5</sup>

<sup>1,2,3,4,5</sup> *Departamento de Química Física, Facultad de Ciencia y Tecnología, Universidad del País Vasco (UPV/EHU), Campus de Leioa, Ap. 644, 48080 Bilbao, Spain.*

<sup>2</sup> *Instituto Biofisika (CSIC, UPV/EHU), 48080 Bilbao, Spain.*

<sup>3</sup> *Current address, Quifima Building, Parque Científico UVa, Universidad de Valladolid, 47005 Valladolid, Spain.*

<sup>†</sup> *These authors contributed the same.*

**Corresponding author:** Emilio J. Cocinero → [emiliojose.cocinero@ehu.eus](mailto:emiliojose.cocinero@ehu.eus)

## Contents

|          |                                                                            |           |
|----------|----------------------------------------------------------------------------|-----------|
| <b>1</b> | <b>Computational Methods</b>                                               | <b>3</b>  |
| 1.1      | Theoretical Conformational Analysis of Gluconolactone (GlcL) . . . . .     | 3         |
| 1.1.1    | Nomenclature used for GlcL . . . . .                                       | 4         |
| 1.2      | Theoretical Conformational Analysis of Glucuronolactone (GlcUrL) . . . . . | 5         |
| 1.2.1    | Interconversion barriers . . . . .                                         | 11        |
| 1.3      | NCI Plots . . . . .                                                        | 11        |
| 1.4      | Cremer-Pople (CP) diagram . . . . .                                        | 12        |
| <b>2</b> | <b>Cartesian coordinates for the observed conformers</b>                   | <b>13</b> |
| <b>3</b> | <b>Experimental Methods</b>                                                | <b>14</b> |
| 3.1      | Relative Populations . . . . .                                             | 14        |
| 3.2      | Experimental data . . . . .                                                | 18        |
| 3.3      | Fitted lines . . . . .                                                     | 18        |

## 1 Computational Methods

The first step<sup>1</sup> involved an exhaustive conformational search of the system using a molecular mechanics (MM) method that combine advanced Monte Carlo and large-scale low-mode atomic redistribution algorithms. In order to avoid any missing conformation three different force-fields were used: Merck Molecular Force Field (MMFFs)<sup>2</sup>, Optimised Potentials for Liquid Simulations (OPLS)<sup>3</sup> and Assisted Model Building with Energy Refinement (AMBER)<sup>4</sup>. All the geometries found were later fully re-optimised by quantum mechanical methods, such as the MP2<sup>5</sup> *ab initio* method and Density Functional Theory (DFT) based B3LYP-D3BJ<sup>6,7</sup>. In both cases, the basis-set used was the Popple’s triple zeta 6-311 basis increased with polarisation and diffusion functions (6-311++G(d,p))<sup>8,9,10</sup>. On the other hand, vibrational contributions in the rotational constants were calculated using the calculated first-order vibration-rotational constants  $\alpha_i$  that define the well-known vibrational dependence of rotational constants

$$B_v = B_e - \sum_i \alpha_i (\nu_i + 1/2) \quad (1)$$

where,  $B_v$  and  $B_e$  substitute all three rotational constants in a given excited state and in equilibrium, respectively.  $\nu_i$  is the vibrational quantum number of the “ $i^{th}$ ” vibrational mode. The  $\alpha_i$  constants of the experimental conformers were obtained from anharmonic calculations at the B3LYP-D3BJ/6-311++G(d,p)<sup>6,7,8,9,10</sup>. All the theoretical calculations were implemented in Gaussian 16.<sup>11</sup>

### 1.1 Theoretical Conformational Analysis of Gluconolactone (GlcL)

Table S1: Predicted  $A$ ,  $B$  and  $C$  rotational constants, dipole moments, relative energies and Gibbs free energies for **GlcL** at MP2 level using 6-311++G (d,p) basis.

| GlcL                                     | 1      | 2      | 4       | 3      | 5      | 6      | 7      | 8      | 9      |
|------------------------------------------|--------|--------|---------|--------|--------|--------|--------|--------|--------|
| $A$ / MHz                                | 1205.1 | 1230.2 | 1216.84 | 1369.4 | 1077.7 | 1276.2 | 1244.3 | 1246.3 | 1373.2 |
| $B$ / MHz                                | 848.1  | 802.8  | 845.4   | 752.7  | 965.8  | 811.8  | 791.4  | 784.5  | 761.9  |
| $C$ / MHz                                | 552.2  | 503.1  | 557.6   | 504.3  | 641.7  | 539.2  | 502.2  | 499.9  | 508.2  |
| $ \mu_a $ / D                            | 1      | 2      | 2       | 1      | 3      | 0      | 0      | 1      | 6      |
| $ \mu_b $ / D                            | 1      | 1      | 1       | 3      | 0      | 3      | 2      | 3      | 1      |
| $ \mu_c $ / D                            | 1      | 1      | 0       | 1      | 2      | 1      | 2      | 0      | 1      |
| $\Delta E + ZPE$ / kJ·mol <sup>-1</sup>  | 0.0    | 2.6    | 5.7     | 6.0    | 6.2    | 8.1    | 12.7   | 14.3   | 16.1   |
| $\Delta G_{298K}$ / kJ·mol <sup>-1</sup> | 0.0    | 2.8    | 4.7     | 6.8    | 6.4    | 8.1    | 11.7   | 13.5   | 16.1   |

Table S2: Predicted parameters for **GlcL** at B3LYP-D3BJ level using 6-311++G (d,p) basis.

| <b>GlcL</b>                             | <b>1</b> | <b>2</b> | <b>3</b> | <b>4</b> | <b>5</b> | <b>6</b> | <b>7</b> | <b>8</b> | <b>9</b> |
|-----------------------------------------|----------|----------|----------|----------|----------|----------|----------|----------|----------|
| A/MHz                                   | 1189.9   | 1224.0   | 1367.9   | 1188.7   | 1071.6   | 1252.3   | 1241.4   | 1242.3   | 1367.8   |
| B/MHz                                   | 845.6    | 797.0    | 747.9    | 848.0    | 946.0    | 808.9    | 783.1    | 776.8    | 756.9    |
| C/MHz                                   | 551.4    | 499.7    | 500.8    | 562.1    | 640.6    | 537.6    | 498.4    | 496.2    | 505.1    |
| $ \mu_a $ /D                            | 0        | 2        | 1        | 2        | 3        | 1        | 1        | 1        | 6        |
| $ \mu_b $ /D                            | 1        | 2        | 3        | 1        | 0        | 3        | 3        | 3        | 1        |
| $ \mu_c $ /D                            | 0        | 1        | 1        | 0        | 2        | 1        | 2        | 0        | 1        |
| $\Delta E + ZPE$ / kJ·mol <sup>-1</sup> | 0.0      | 2.2      | 4.5      | 6.0      | 6.4      | 8.1      | 12.7     | 13.4     | 15.1     |
| $\Delta G$ / kJ·mol <sup>-1</sup>       | 0.0      | 2.3      | 5.5      | 4.2      | 6.3      | 7.5      | 11.8     | 12.5     | 15.4     |

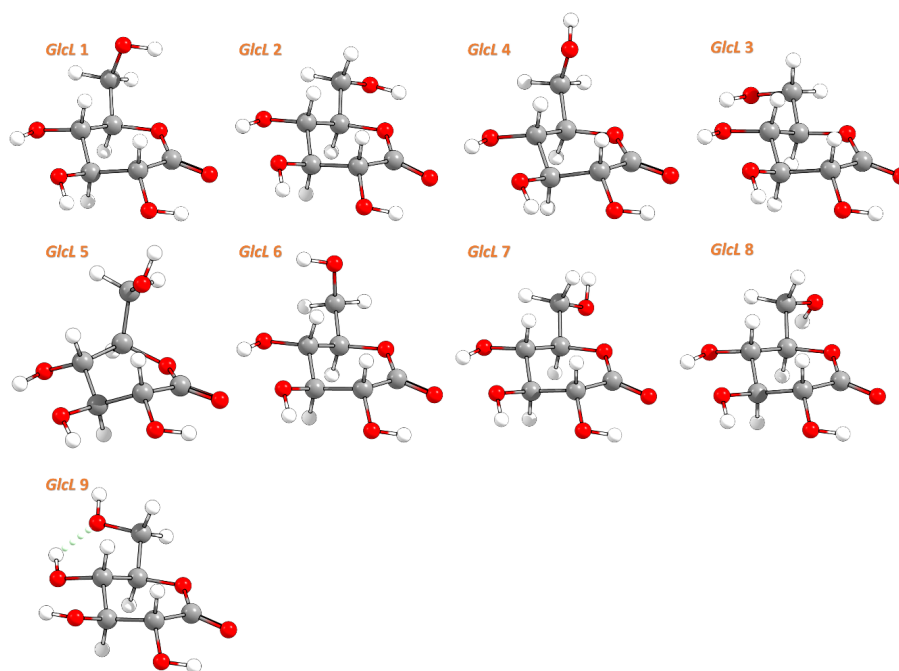Figure S1: Minima identified for **GlcL** optimised at MP2 level using 6-311++G (d,p) basis.

### 1.1.1 Nomenclature used for **GlcL**

The terminology used to name the different conformers **GlcL** has been chosen taking into account the three staggered orientations of the torsional angle  $\omega$  and the counterclockwise (**cc**)/clockwise (**c**) orientation of the hydroxyl (OH) groups leading to a cooperative network of hydrogen bonds (HBs) as indicated below:



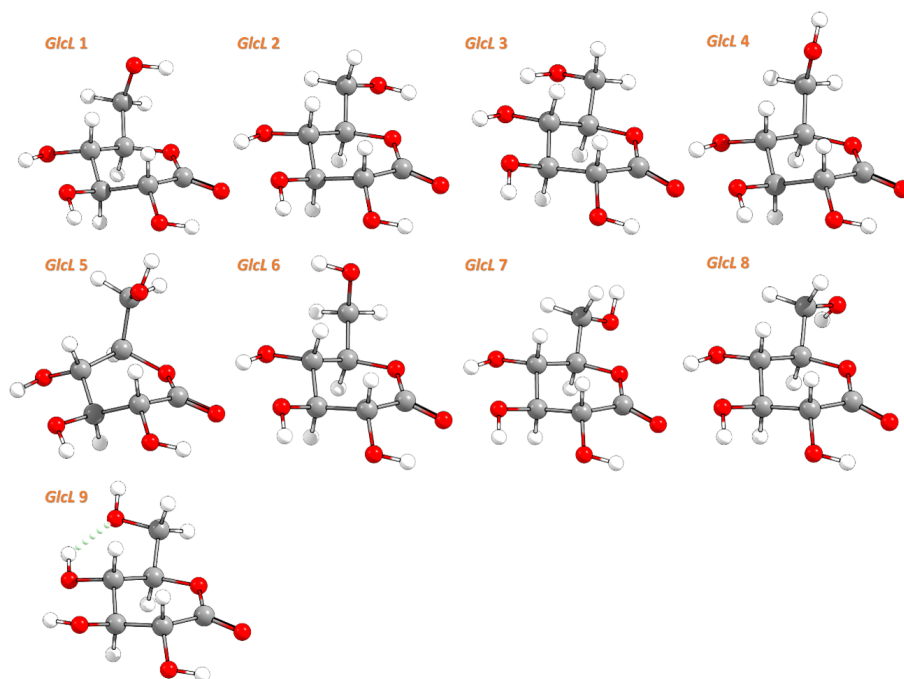

Figure S2: Predicted structures for **GlcL** optimised at B3LYP-D3BJ level using 6-311++G (d,p) basis.

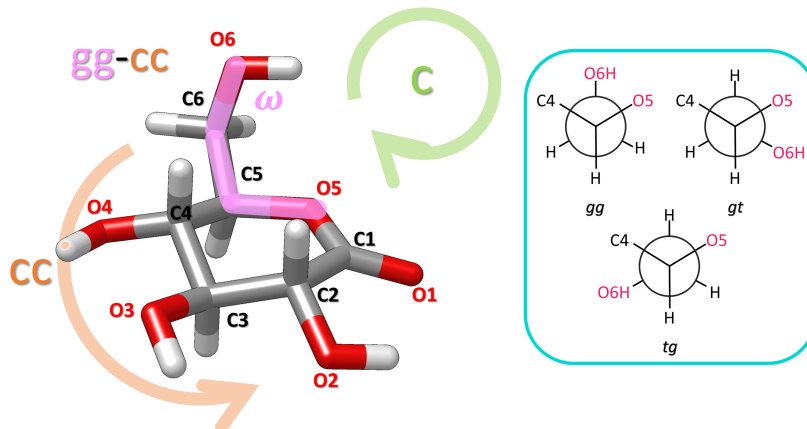

Figure S3: Indication of the torsional angle  $\omega$  for the molecular system and the nomenclature used according to its value.

## 1.2 Theoretical Conformational Analysis of Glucuronolactone (GlcL)

Table S3: Predicted parameters for  $\beta$ -*f*-GlcuL at MP2 level using 6-311++G (d,p) basis.

| $\beta$ - <i>f</i> -GlcuL               | 1       | 2       | 3       | 4       | 5       | 6       | 7       | 8       | 9       | 10      | 11      |
|-----------------------------------------|---------|---------|---------|---------|---------|---------|---------|---------|---------|---------|---------|
| A/MHz                                   | 1669.60 | 1582.50 | 1648.90 | 1654.70 | 1587.50 | 1585.10 | 1590.90 | 1611.50 | 1594.10 | 1540.30 | 1551.70 |
| B/MHz                                   | 884.80  | 811.10  | 884.00  | 880.10  | 805.60  | 831.20  | 831.10  | 856.30  | 822.10  | 858.00  | 851.80  |
| C/MHz                                   | 787.20  | 774.70  | 784.20  | 781.20  | 771.20  | 788.60  | 784.60  | 791.40  | 780.80  | 694.00  | 692.10  |
| $ \mu_a $ /D                            | 1       | 4       | 2       | 2       | 4       | 5       | 4       | 3       | 3       | 0       | 2       |
| $ \mu_b $ /D                            | 2       | 1       | 1       | 1       | 1       | 2       | 1       | 3       | 2       | 1       | 0       |
| $ \mu_c $ /D                            | 2       | 2       | 1       | 2       | 4       | 0       | 2       | 1       | 3       | 0       | 1       |
| $\Delta E + ZPE$ / kJ·mol <sup>-1</sup> | 0.0     | 0.7     | 1.8     | 2.8     | 3.2     | 3.7     | 3.8     | 4.7     | 5.8     | 19.8    | 21.6    |
| $\Delta G$ / kJ·mol <sup>-1</sup>       | 1.1     | 0.0     | 2.0     | 2.5     | 2.5     | 1.3     | 1.7     | 4.0     | 5.0     | 19.3    | 20.9    |

Table S4: Predicted parameters for  $\beta$ -*f*-GlcuL at B3LYP-D3BJ level using 6-311++G (d,p) basis.

| $\beta$ - <i>f</i> -GlcuL               | 1      | 2      | 3      | 4      | 5      | 6      | 7      | 8      | 9      | 10     | 11     |
|-----------------------------------------|--------|--------|--------|--------|--------|--------|--------|--------|--------|--------|--------|
| A/MHz                                   | 1647.0 | 1569.6 | 1620.0 | 1626.8 | 1564.1 | 1574.6 | 1570.5 | 1584.4 | 1589.2 | 1514.6 | 1524.7 |
| B/MHz                                   | 873.8  | 797.6  | 874.6  | 869.7  | 819.8  | 793.7  | 821.3  | 814.2  | 842.9  | 860.6  | 854.6  |
| C/MHz                                   | 771.9  | 772.2  | 765.7  | 763.7  | 770.4  | 767.4  | 766.7  | 775.0  | 776.8  | 688.2  | 686.7  |
| $ \mu_a $ /D                            | 1.1    | 4.5    | 2.2    | 1.7    | 5.2    | 3.8    | 4.6    | 3.0    | 3.7    | 0.3    | -1.3   |
| $ \mu_b $ /D                            | 1.7    | 0.6    | 1.0    | -0.9   | 1.8    | -0.4   | 0.3    | 1.2    | 2.8    | 0.7    | -0.5   |
| $ \mu_c $ /D                            | -2.7   | -2.2   | -1.3   | -2.2   | -0.5   | -4.1   | -1.9   | -2.8   | -1.4   | -0.5   | -0.8   |
| $\Delta E + ZPE$ / kJ·mol <sup>-1</sup> | 0.0    | 0.1    | 0.9    | 2.1    | 2.2    | 2.2    | 2.3    | 3.6    | 3.7    | 11.9   | 13.4   |
| $\Delta G$ / kJ·mol <sup>-1</sup>       | 1.1    | 0.0    | 1.0    | 2.0    | 0.9    | 1.8    | 1.2    | 3.6    | 3.5    | 12.1   | 13.5   |

\*

\* $\alpha$ -GlcuL **5** conformer converged to  $\alpha$ -GlcuL **2** using MP2/6-311++G(d,p).

Table S5: Predicted parameters for  $\alpha$ -*f*-GlcUrL at MP2 level using 6-311++G (d,p) basis.

| $\alpha$ - <i>f</i> -GlcUrL             | 1      | 2      | 3      | 4      | 5 |
|-----------------------------------------|--------|--------|--------|--------|---|
| A/MHz                                   | 1767.0 | 1812.8 | 1731.6 | 1676.3 | - |
| B/MHz                                   | 741.5  | 732.1  | 744.9  | 759.2  | - |
| C/MHz                                   | 661.2  | 654.4  | 670.3  | 688.4  | - |
| $ \mu_a $ /D                            | 3.2    | 1.5    | 4.3    | 2.6    | - |
| $ \mu_b $ /D                            | 1.2    | 0.5    | 2.1    | 0.7    | - |
| $ \mu_c $ /D                            | 0.3    | 0.7    | 2.6    | 3.7    | - |
| $\Delta E + ZPE$ / kJ·mol <sup>-1</sup> | 0.0    | 2.2    | 4.8    | 13.4   | - |
| $\Delta G$ / kJ·mol <sup>-1</sup>       | 0.0    | 2.0    | 4.2    | 14.3   | - |

†

†Only b3lyp calculations were performed for this form, as we did not expect to observe it experimentally.

Table S6: Predicted parameters for  $\alpha$ -*f*-GlcUrL at B3LYP-D3BJ level using 6-311++G (d,p) basis.

| $\alpha$ - <i>f</i> -GlcUrL                        | 1      | 2      | 3      | 4      | 5      |
|----------------------------------------------------|--------|--------|--------|--------|--------|
| A/MHz                                              | 1766.4 | 1817.9 | 1725.1 | 1676.9 | 1795.8 |
| B/MHz                                              | 735.6  | 723.9  | 741.4  | 754.3  | 760.4  |
| C/MHz                                              | 639.1  | 632.6  | 651.1  | 668.3  | 628.7  |
| $ \mu_a $ /D                                       | 3.6    | 2.0    | 4.4    | 3.0    | 2.6    |
| $ \mu_b $ /D                                       | 1.5    | 0.8    | 2.8    | 0.8    | 3.3    |
| $ \mu_c $ /D                                       | 0.4    | 0.6    | 3.0    | 3.9    | 1.4    |
| $\Delta E + ZPE$ / $\text{kJ}\cdot\text{mol}^{-1}$ | 0.0    | 1.6    | 4.2    | 12.4   | 16.1   |
| $\Delta G$ / $\text{kJ}\cdot\text{mol}^{-1}$       | 0.0    | 0.8    | 3.8    | 13.6   | 17.0   |

Table S7: Predicted parameters for  $\beta$ -*p*-GlcUrL at B3LYP-D3BJ level using 6-311++G (d,p) basis.

| $\beta$ - <i>p</i> -GlcUrL                         | 1      | 2      | 3      | 4      | 5      | 6      |
|----------------------------------------------------|--------|--------|--------|--------|--------|--------|
| A/MHz                                              | 1418.8 | 1405.1 | 1401.9 | 1411.9 | 1405.5 | 1365.2 |
| B/MHz                                              | 1011.7 | 1029.4 | 1028.8 | 1022.8 | 1014.1 | 898.2  |
| C/MHz                                              | 852.8  | 838.7  | 837.7  | 841.6  | 840.4  | 795.5  |
| $ \mu_a $ /D                                       | 1.8    | 3.4    | 3.5    | 2.9    | 1.8    | 3.9    |
| $ \mu_b $ /D                                       | 1.0    | -0.9   | -2.5   | 2.8    | 2.4    | 2.2    |
| $ \mu_c $ /D                                       | 2.1    | -0.9   | 0.2    | 0.7    | -0.2   | 1.0    |
| $\Delta E + ZPE$ / $\text{kJ}\cdot\text{mol}^{-1}$ | 0.0    | 3.4    | 3.9    | 5.8    | 10.0   | 18.0   |
| $\Delta G$ / $\text{kJ}\cdot\text{mol}^{-1}$       | 0.0    | 2.8    | 3.4    | 5.3    | 9.5    | 12.7   |

‡

‡Only b3lyp calculations were performed for this form, as we did not expect to observe it experimentally.

Table S8: Predicted parameters for  $\alpha$ -*p*-GlcUrL at B3LYP-D3BJ level using 6-311++G (d,p) basis.

| $\alpha$ - <i>p</i> -GlcUrL             | 1      | 2      | 3      | 4      |
|-----------------------------------------|--------|--------|--------|--------|
| A/MHz                                   | 1405.0 | 1440.7 | 1388.4 | 1399.3 |
| B/MHz                                   | 962.9  | 936.9  | 967.4  | 962.9  |
| C/MHz                                   | 802.8  | 817.0  | 798.4  | 802.3  |
| $ \mu_a $ /D                            | 2.4    | 1.1    | 3.3    | 0.9    |
| $ \mu_b $ /D                            | 1.1    | 3.1    | 2.6    | 5.7    |
| $ \mu_c $ /D                            | 0.4    | 0.2    | 2.9    | 0.5    |
| $\Delta E + ZPE$ / kJ·mol <sup>-1</sup> | 0.0    | 2.1    | 8.4    | 9.3    |
| $\Delta G$ / kJ·mol <sup>-1</sup>       | 0.0    | 2.8    | 7.8    | 9.4    |

Table S9: Predicted parameters for *l*-GlcUrL at B3LYP-D3BJ level using 6-311++G (d,p) basis.

| <i>l</i> -GlcUrL                        | 1      | 2      | 3      | 4      | 5      | 6      | 7      | 8      | 9      | 10     | 11     | 12     | 13     |
|-----------------------------------------|--------|--------|--------|--------|--------|--------|--------|--------|--------|--------|--------|--------|--------|
| A/MHz                                   | 1745.3 | 1335.4 | 1680.7 | 1680.8 | 1655.3 | 1655.3 | 1901.3 | 1679.5 | 1574.0 | 1765.9 | 1444.8 | 1686.5 | 1666.8 |
| B/MHz                                   | 649.2  | 827.4  | 656.5  | 656.3  | 695.6  | 695.6  | 613.0  | 668.0  | 727.9  | 657.2  | 858.7  | 626.1  | 690.0  |
| C/MHz                                   | 608.4  | 672.7  | 573.8  | 573.8  | 541.3  | 541.3  | 499.5  | 619.6  | 537.8  | 551.7  | 798.1  | 580.1  | 543.4  |
| $ \mu_a $ /D                            | 1.6    | 1.4    | 1.9    | 1.9    | 0.3    | 0.3    | 0.8    | 2.4    | 3.8    | 3.2    | 2.7    | 0.9    | 0.8    |
| $ \mu_b $ /D                            | 0.3    | 3.4    | 2.8    | 2.8    | 0.4    | 0.4    | 3.3    | 1.6    | 0.6    | 2.7    | 1.4    | 1.3    | 1.2    |
| $ \mu_c $ /D                            | 2.0    | 2.4    | 2.3    | 2.3    | 0.3    | 0.3    | 1.7    | 2.4    | 1.6    | 4.2    | 1.4    | 1.6    | 1.6    |
| $\Delta E + ZPE$ / kJ·mol <sup>-1</sup> | 0.0    | 2.4    | 3.7    | 3.7    | 7.2    | 7.2    | 8.6    | 9.2    | 9.4    | 10.1   | 13.6   | 16.6   | 19.2   |
| $\Delta G$ / kJ·mol <sup>-1</sup>       | 0.0    | 3.1    | 2.8    | 2.8    | 5.6    | 5.7    | 7.7    | 8.1    | 9.0    | 9.0    | 14.9   | 13.8   | 16.8   |

§

§Only b3lyp calculations were performed for this form, as we did not expect to observe it experimentally.

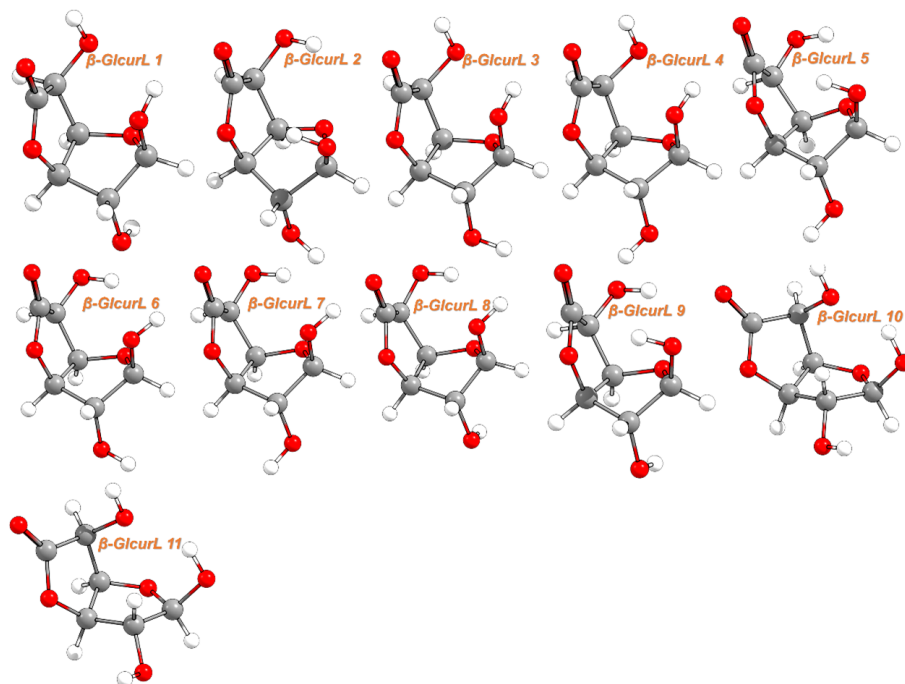

Figure S4: Predicted structures for  $\beta$ -f-GlcUrL optimised at MP2 level using 6-311++G (d,p) basis.

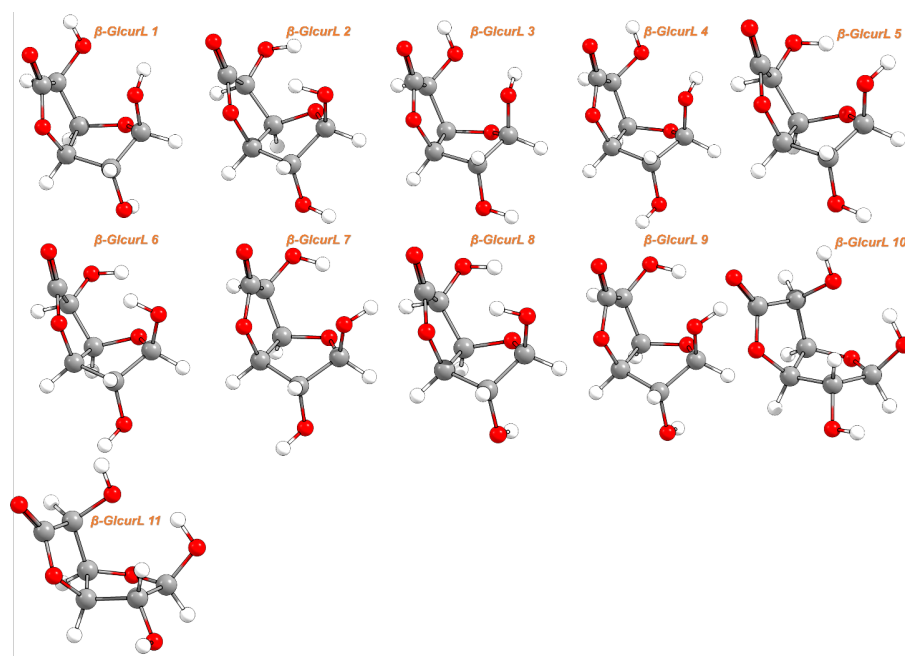

Figure S5: Predicted structures for  $\beta$ -f-GlcUrL optimised at B3LYP-D3BJ level using 6-311++G (d,p) basis.

## 1.2.1 Interconversion barriers

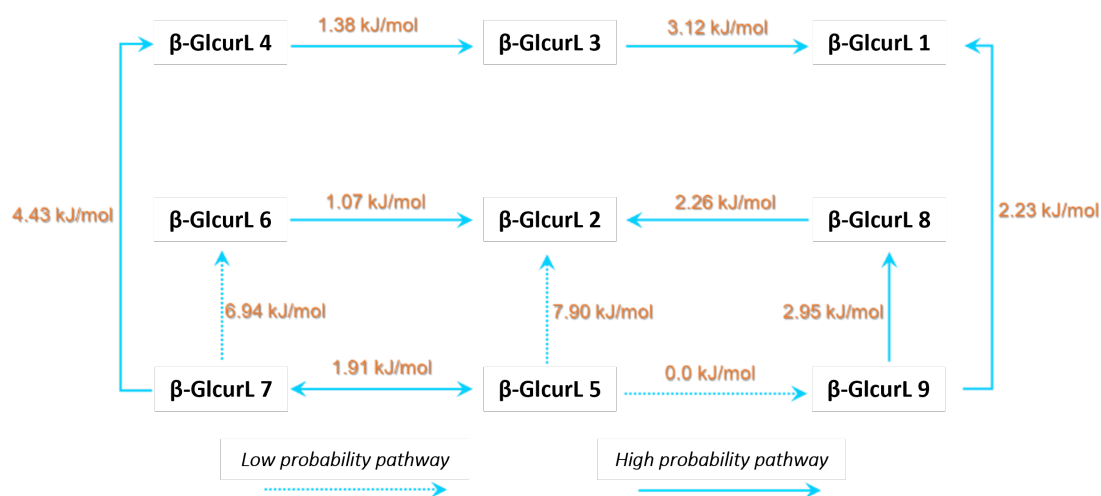Figure S6: Interconversion pathways among the conformers of  $\beta$ -GlcL.

## 1.3 NCI Plots

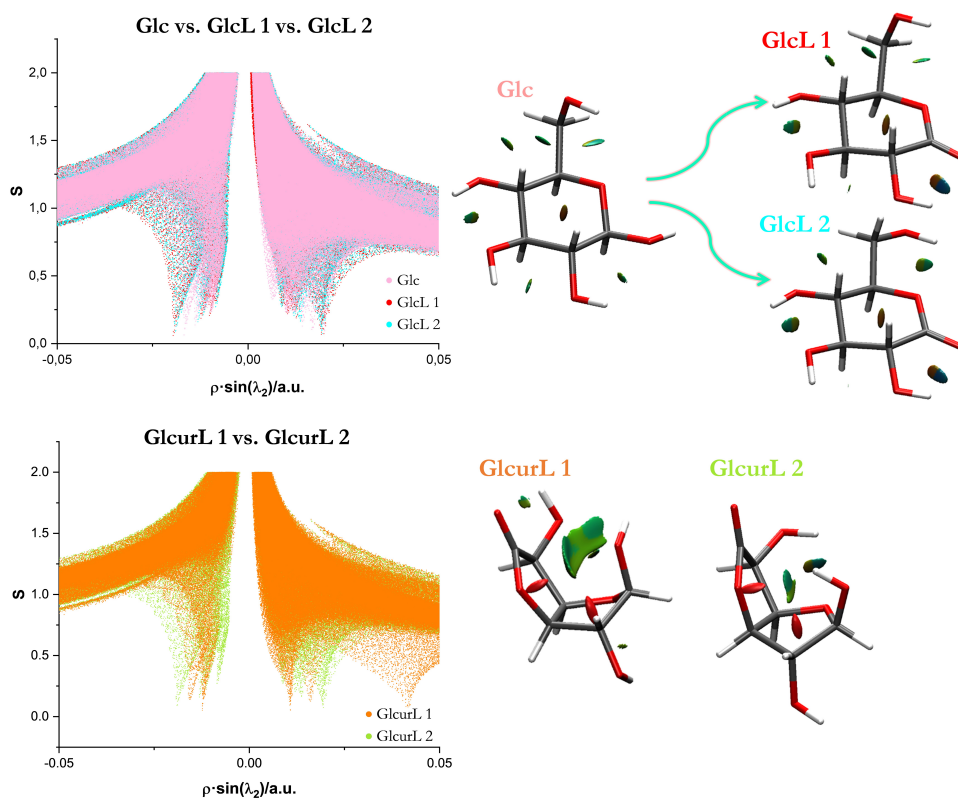Figure S7: NCI plot for the most stable conformer of  $\beta$ -Glc and the experimentally observed conformers of **GlcL** and  $\beta$ -GlcL.

## 1.4 Cremer-Pople (CP) diagram

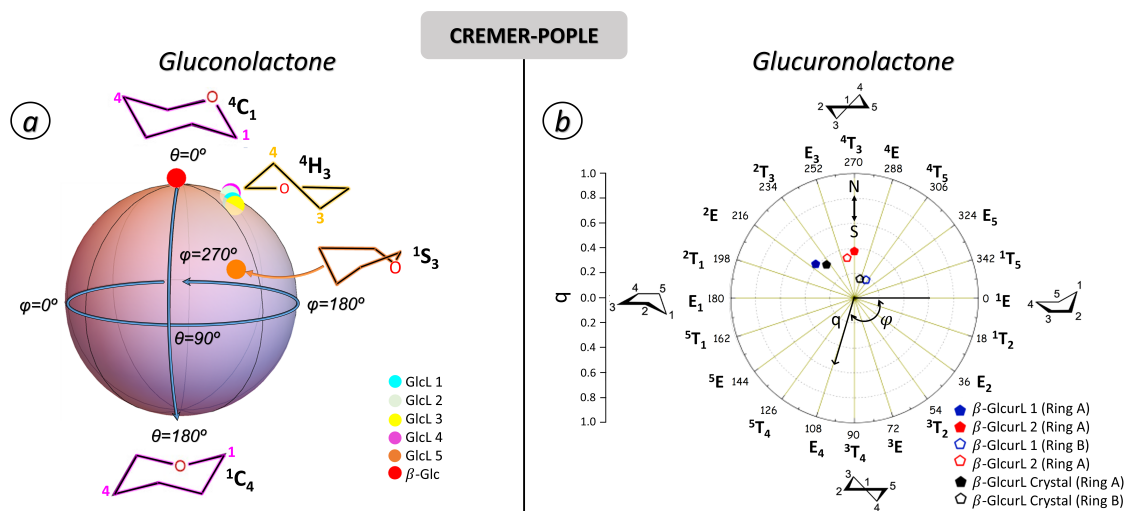

Figure S8: (a) CP-sphere representing the “pure” configurations for six-membered pyranose rings together with the six most stable conformers of **GlcL** and  $\beta$ -**Glc**. (b) 2D CP-diagram of the most stable conformers of  $\beta$ -**GlcUrL**.



## 2 Cartesian coordinates for the observed conformers

Table S10: Cartesian coordinates for **GlcL 1**. The geometries have been optimised at the B3LYP-GD3BJ/6-311++G(d,p) level of theory.

| Center | Atomic Number | Atomic Type | X         | Y         | Z         |
|--------|---------------|-------------|-----------|-----------|-----------|
| 1      | 8             | O           | 0.436927  | 1.409941  | 0.376652  |
| 2      | 6             | C           | 1.217281  | 0.206645  | 0.654918  |
| 3      | 6             | C           | 0.661931  | -1.043338 | -0.022986 |
| 4      | 6             | C           | -0.837637 | -1.135905 | 0.195822  |
| 5      | 6             | C           | -1.486862 | 0.092015  | -0.415796 |
| 6      | 6             | C           | -0.885274 | 1.383922  | 0.131044  |
| 7      | 8             | O           | -1.557530 | 2.373449  | 0.262686  |
| 8      | 8             | O           | -2.879143 | 0.053849  | -0.199777 |
| 9      | 8             | O           | 1.345733  | -2.139321 | 0.562421  |
| 10     | 8             | O           | -1.281912 | -2.334459 | -0.423091 |
| 11     | 6             | C           | 2.638543  | 0.536250  | 0.222797  |
| 12     | 8             | O           | 2.716447  | 0.838727  | -1.161216 |
| 13     | 1             | H           | 1.190216  | 0.053038  | 1.737951  |
| 14     | 1             | H           | 0.863459  | -0.997053 | -1.100256 |
| 15     | 1             | H           | -1.053923 | -1.165015 | 1.272712  |
| 16     | 1             | H           | -1.268819 | 0.090538  | -1.495710 |
| 17     | 1             | H           | -3.182885 | 0.969923  | -0.121942 |
| 18     | 1             | H           | 0.926345  | -2.944451 | 0.235813  |
| 19     | 1             | H           | -2.239762 | -2.389309 | -0.327301 |
| 20     | 1             | H           | 3.263190  | -0.340376 | 0.395767  |
| 21     | 1             | H           | 3.016093  | 1.364359  | 0.832715  |
| 22     | 1             | H           | 2.266157  | 1.678113  | -1.306044 |

Table S11: Cartesian coordinates for **GlcL 1**. The geometries have been optimised at the MP2/6-311++G(d,p) level of theory.

| Center | Atomic Number | Atomic Type | X         | Y         | Z         |
|--------|---------------|-------------|-----------|-----------|-----------|
| 1      | 8             | O           | 0.445177  | 1.421266  | 0.328941  |
| 2      | 6             | C           | 1.193793  | 0.218364  | 0.651790  |
| 3      | 6             | C           | 0.657249  | -1.026616 | -0.040026 |
| 4      | 6             | C           | -0.832551 | -1.132655 | 0.198803  |
| 5      | 6             | C           | -1.492312 | 0.082838  | -0.411372 |
| 6      | 6             | C           | -0.888590 | 1.382620  | 0.111844  |
| 7      | 8             | O           | -1.565714 | 2.376886  | 0.234310  |
| 8      | 8             | O           | -2.878173 | 0.032144  | -0.155718 |
| 9      | 8             | O           | 1.356414  | -2.118143 | 0.533948  |
| 10     | 8             | O           | -1.276705 | -2.334910 | -0.410228 |
| 11     | 6             | C           | 2.628968  | 0.529230  | 0.260421  |
| 12     | 8             | O           | 2.738549  | 0.812310  | -1.124324 |
| 13     | 1             | H           | 1.128947  | 0.066256  | 1.736265  |
| 14     | 1             | H           | 0.849872  | -0.965003 | -1.119714 |
| 15     | 1             | H           | -1.031394 | -1.155901 | 1.281064  |
| 16     | 1             | H           | -1.298345 | 0.069936  | -1.496304 |
| 17     | 1             | H           | -3.185265 | 0.949042  | -0.146883 |
| 18     | 1             | H           | 0.904157  | -2.912818 | 0.225263  |
| 19     | 1             | H           | -2.235762 | -2.364475 | -0.312491 |
| 20     | 1             | H           | 3.241008  | -0.352375 | 0.458964  |
| 21     | 1             | H           | 2.992351  | 1.365506  | 0.869824  |
| 22     | 1             | H           | 2.288390  | 1.651104  | -1.269168 |

### 3 Experimental Methods

The MB-FTMW coupled to a laser ablation system at the University of the Basque Country was employed in this work with the objective of obtaining the rotational spectra of both sugar-lactones. The Fourier Transform Microwave spectrometer (FTMW) consists of a Fabry-Pérot resonator where a microwave pulse is guided through two antennas. One of them is fixed to a movable mirror making possible the tuning of all the frequencies in the operating range 4-18 GHz and polarizing the sample previously injected in the vacuum chamber ( $10^{-7}$  mmbar) using an inert gas through a solenoid pulse valve.<sup>12,13,14</sup> The subsequent free induced decay is recorded in the time domain and Fourier transformed to the frequency domain. The accuracy of the measurements is better than 3 kHz and rotational transitions separated by more than 10 kHz are resolvable.

The chemicals used are D-(+)-Glucono-1,5-lactone (Gluconolactone, 178.14 g/mol), purchased by TCI, 25g, > 98.0%(T). It appears as a white powder to crystal. Melting point: 153 °C. D-(+)-glucuronolactone (Glucuronolactone, 176.124 g/mol), purchased by xxx, xxx g, xxx > xx%. It appears as a xxx. Melting point: xxx °C.

Approximately 0.7-1 g of the commercial samples were blended with a commercial glue and mechanically compressed into rod forms. These rods were then placed in a stepper motor, rotating, and translating while a homogenous laser beam hits the sample. This laser ablation process, facilitated by a 7-8 mJ (35 ps) third harmonic (355 nm) laser pulse from a Nd:YAG laser, ensures the intact transfer of samples to the gas phase. The vaporized samples were subsequently mixed with the carrier gas, Ar in this instance, at an approximate pressure of 8 bar.

#### 3.1 Relative Populations

As for **GlcL**, an estimation of the relative population of the observed conformers can be obtained by relative intensities (I) measurements. This can be done because there is a direct relation between the intensities and the population of each conformer in the jet (Ar). The relation between them

Table S12: Cartesian coordinates for **GlcL 2**. The geometries have been optimised at the B3LYP-GD3BJ/6-311++G(d,p) level of theory.

| Center | Atomic Number | Atomic Type | X         | Y         | Z         |
|--------|---------------|-------------|-----------|-----------|-----------|
| 1      | 8             | O           | -0.727832 | 1.199694  | 0.082660  |
| 2      | 6             | C           | -1.227452 | -0.136002 | -0.244279 |
| 3      | 6             | C           | -0.289272 | -1.237534 | 0.237439  |
| 4      | 6             | C           | 1.121989  | -0.950780 | -0.249078 |
| 5      | 6             | C           | 1.577114  | 0.376803  | 0.330119  |
| 6      | 6             | C           | 0.582436  | 1.502419  | 0.050360  |
| 7      | 8             | O           | 0.956424  | 2.635950  | -0.099123 |
| 8      | 8             | O           | 2.856474  | 0.696645  | -0.165839 |
| 9      | 8             | O           | -0.785791 | -2.457222 | -0.281697 |
| 10     | 8             | O           | 1.941768  | -2.027753 | 0.182120  |
| 11     | 6             | C           | -2.613630 | -0.211718 | 0.370268  |
| 12     | 8             | O           | -3.487249 | 0.763844  | -0.166600 |
| 13     | 1             | H           | -1.309001 | -0.182866 | -1.333664 |
| 14     | 1             | H           | -0.280173 | -1.265844 | 1.337124  |
| 15     | 1             | H           | 1.124804  | -0.889947 | -1.345699 |
| 16     | 1             | H           | 1.608136  | 0.275030  | 1.426934  |
| 17     | 1             | H           | 2.919331  | 1.662249  | -0.198735 |
| 18     | 1             | H           | -0.098856 | -3.122933 | -0.152028 |
| 19     | 1             | H           | 2.846186  | -1.858085 | -0.105703 |
| 20     | 1             | H           | -2.525592 | -0.114916 | 1.461225  |
| 21     | 1             | H           | -3.041895 | -1.187570 | 0.142058  |
| 22     | 1             | H           | -3.099506 | 1.631773  | -0.005678 |

also includes the values of the dipole moment component involved along each axis ( $\mu_g$  with  $g=a,b$  and/or  $c$ ) according to the following expression:

$$\frac{N_i}{N_0} \propto \frac{I_i \omega_0 \Delta \nu_i \mu_g(0) \lambda_0 \nu_0^2}{I_0 \omega_i \Delta \nu_0 \mu_g(i) \lambda_i \nu_i^2} \propto \frac{I_i \mu_g(0)}{I_0 \mu_g(i)} \quad (2)$$

where  $\omega$  is the conformational degeneration and  $\Delta \nu$  the line width at half height.<sup>15</sup> In this way, if the transition intensities are well-known for the different conformers, it is possible to estimate the abundance of each conformer respect to the most stable one. The analysis was performed considering nearby in frequency  $\mu_b$ -type transitions in order to minimise the errors of the estimation, taking into account the MP2 dipole moments values of Table ???. The average of the data corresponding to a single conformer were used to obtain the final ratio in percentage.

Table S13: Cartesian coordinates for **GlcL 2**. The geometries have been optimised at the MP2/6-311++G(d,p) level of theory.

| Center | Atomic Number | Atomic Type | X         | Y         | Z         |
|--------|---------------|-------------|-----------|-----------|-----------|
| 1      | 8             | O           | -0.739102 | 1.194740  | 0.145613  |
| 2      | 6             | C           | -1.210302 | -0.128296 | -0.234410 |
| 3      | 6             | C           | -0.282855 | -1.228797 | 0.256057  |
| 4      | 6             | C           | 1.116384  | -0.948363 | -0.250038 |
| 5      | 6             | C           | 1.577161  | 0.374074  | 0.321697  |
| 6      | 6             | C           | 0.576563  | 1.498869  | 0.066971  |
| 7      | 8             | O           | 0.947834  | 2.638937  | -0.083706 |
| 8      | 8             | O           | 2.842007  | 0.688326  | -0.215599 |
| 9      | 8             | O           | -0.789375 | -2.447540 | -0.254504 |
| 10     | 8             | O           | 1.942571  | -2.022201 | 0.173043  |
| 11     | 6             | C           | -2.611280 | -0.227433 | 0.336507  |
| 12     | 8             | O           | -3.467140 | 0.759276  | -0.208762 |
| 13     | 1             | H           | -1.260325 | -0.157452 | -1.329245 |
| 14     | 1             | H           | -0.266808 | -1.243372 | 1.357423  |
| 15     | 1             | H           | 1.099180  | -0.888396 | -1.348444 |
| 16     | 1             | H           | 1.637858  | 0.268858  | 1.417411  |
| 17     | 1             | H           | 2.915757  | 1.652138  | -0.190493 |
| 18     | 1             | H           | -0.081197 | -3.094707 | -0.146391 |
| 19     | 1             | H           | 2.840094  | -1.822347 | -0.118028 |
| 20     | 1             | H           | -2.551419 | -0.148841 | 1.431418  |
| 21     | 1             | H           | -3.030055 | -1.199389 | 0.071384  |
| 22     | 1             | H           | -3.062340 | 1.611669  | -0.014902 |

Table S14: Cartesian coordinates for  $\beta$ -**GlcuL 1**. The geometries have been optimised at the B3LYP-GD3BJ/6-311++G(d,p) level of theory.

| Center | Atomic Number | Atomic Type | X         | Y         | Z         |
|--------|---------------|-------------|-----------|-----------|-----------|
| 1      | 6             | O           | 1.710752  | -0.605656 | 0.354114  |
| 2      | 6             | C           | 0.622018  | -0.955796 | -0.680907 |
| 3      | 6             | C           | 0.130297  | 0.436561  | -1.177726 |
| 4      | 6             | C           | 1.293546  | 0.804164  | 0.779546  |
| 5      | 1             | C           | 1.723976  | -1.314972 | 1.178305  |
| 6      | 1             | C           | 1.012612  | -1.610754 | -1.456556 |
| 7      | 1             | O           | 0.329097  | 0.625410  | -2.230201 |
| 8      | 1             | O           | 2.115550  | 1.414462  | 1.161281  |
| 9      | 8             | O           | 0.875980  | 1.404393  | -0.439027 |
| 10     | 8             | O           | 2.996150  | -0.602568 | -0.240887 |
| 11     | 1             | C           | 3.069771  | 0.167629  | -0.817514 |
| 12     | 8             | O           | -0.495470 | -1.621390 | -0.057428 |
| 13     | 6             | H           | -1.576990 | -0.815767 | 0.014050  |
| 14     | 8             | H           | -2.557973 | -1.059559 | 0.655711  |
| 15     | 6             | H           | -1.379372 | 0.406912  | -0.880221 |
| 16     | 1             | H           | -1.910894 | 0.193176  | -1.819260 |
| 17     | 8             | H           | -1.867697 | 1.582917  | -0.283540 |
| 18     | 1             | H           | -2.705169 | 1.350097  | 0.140704  |
| 19     | 8             | H           | 0.235898  | 0.695457  | 1.695419  |
| 20     | 1             | H           | -0.258697 | 1.525548  | 1.676704  |

Table S15: Cartesian coordinates for  $\beta$ -**GlcuL 1**. The geometries have been optimised at the MP2/6-311++G(d,p) level of theory.

| Center | Atomic Number | Atomic Type | X         | Y         | Z         |
|--------|---------------|-------------|-----------|-----------|-----------|
| 1      | 6             | O           | 1.712142  | -0.619861 | 0.331127  |
| 2      | 6             | C           | 0.638590  | -0.918944 | -0.726346 |
| 3      | 6             | C           | 0.156314  | 0.500530  | -1.144566 |
| 4      | 6             | C           | 1.247126  | 0.733103  | 0.857639  |
| 5      | 1             | C           | 1.758716  | -1.393727 | 1.096909  |
| 6      | 1             | C           | 1.039580  | -1.524115 | -1.540230 |
| 7      | 1             | O           | 0.384248  | 0.758264  | -2.179190 |
| 8      | 1             | O           | 2.038177  | 1.326715  | 1.324480  |
| 9      | 8             | O           | 0.872994  | 1.424335  | -0.323786 |
| 10     | 8             | O           | 2.989701  | -0.506972 | -0.267340 |
| 11     | 1             | C           | 2.989077  | 0.305024  | -0.788571 |
| 12     | 8             | O           | -0.474342 | -1.622110 | -0.146479 |
| 13     | 6             | H           | -1.549803 | -0.804061 | -0.025507 |
| 14     | 8             | H           | -2.530958 | -1.064000 | 0.619768  |
| 15     | 6             | H           | -1.352738 | 0.441747  | -0.883023 |
| 16     | 1             | H           | -1.861079 | 0.242029  | -1.839352 |
| 17     | 8             | H           | -1.858989 | 1.598547  | -0.265964 |
| 18     | 1             | H           | -2.717284 | 1.342291  | 0.097535  |
| 19     | 8             | H           | 0.153025  | 0.518357  | 1.705829  |
| 20     | 1             | H           | -0.304275 | 1.365668  | 1.786799  |

Table S16: Cartesian coordinates for  $\beta$ -**GlcuL 2**. The geometries have been optimised at the B3LYP-GD3BJ/6-311++G(d,p) level of theory.

| Center | Atomic Number | Atomic Type | X         | Y         | Z         |
|--------|---------------|-------------|-----------|-----------|-----------|
| 1      | 6             | O           | 1.828844  | -0.501849 | -0.278287 |
| 2      | 6             | C           | 0.557563  | -0.352466 | -1.101880 |
| 3      | 6             | C           | 0.000370  | 0.999788  | -0.656347 |
| 4      | 6             | C           | 1.432610  | 0.177722  | 1.051009  |
| 5      | 1             | C           | 2.107324  | -1.548016 | -0.126049 |
| 6      | 1             | C           | 0.727473  | -0.460579 | -2.171830 |
| 7      | 1             | O           | 0.307921  | 1.837857  | -1.280020 |
| 8      | 1             | O           | 2.270466  | 0.681659  | 1.533660  |
| 9      | 8             | O           | 0.488069  | 1.190985  | 0.680171  |
| 10     | 8             | O           | 2.825724  | 0.222887  | -0.981350 |
| 11     | 1             | C           | 3.650781  | 0.192551  | -0.486805 |
| 12     | 8             | O           | -0.413045 | -1.331673 | -0.657068 |
| 13     | 6             | H           | -1.602638 | -0.734657 | -0.301951 |
| 14     | 8             | H           | -2.499679 | -1.352781 | 0.178613  |
| 15     | 6             | H           | -1.509881 | 0.772060  | -0.605944 |
| 16     | 1             | H           | -1.943166 | 0.928644  | -1.599743 |
| 17     | 8             | H           | -2.209747 | 1.583665  | 0.286415  |
| 18     | 1             | H           | -1.709797 | 1.601627  | 1.114029  |
| 19     | 8             | H           | 0.919442  | -0.705093 | 2.003551  |
| 20     | 1             | H           | 0.285259  | -1.305850 | 1.591040  |

Table S17: Cartesian coordinates for  $\beta$ -GlcL 2. The geometries have been optimised at the MP2-GD3BJ/6-311++G(d,p) level of theory.

| Center | Atomic Number | Atomic Type | X         | Y         | Z         |
|--------|---------------|-------------|-----------|-----------|-----------|
| 1      | 6             | O           | 1.843613  | -0.337939 | -0.438097 |
| 2      | 6             | C           | 0.559501  | 0.040030  | -1.152655 |
| 3      | 6             | C           | 0.002400  | 1.149480  | -0.269431 |
| 4      | 6             | C           | 1.427640  | -0.215767 | 1.037904  |
| 5      | 1             | C           | 2.186650  | -1.349296 | -0.679775 |
| 6      | 1             | C           | 0.705134  | 0.302054  | -2.202431 |
| 7      | 1             | O           | 0.340035  | 2.151275  | -0.540791 |
| 8      | 1             | O           | 2.248616  | 0.109141  | 1.681236  |
| 9      | 8             | O           | 0.437308  | 0.821152  | 1.056969  |
| 10     | 8             | O           | 2.776431  | 0.661831  | -0.813720 |
| 11     | 1             | C           | 3.592467  | 0.504380  | -0.328178 |
| 12     | 8             | O           | -0.381361 | -1.048635 | -1.030143 |
| 13     | 6             | H           | -1.579245 | -0.594381 | -0.504446 |
| 14     | 8             | H           | -2.471139 | -1.340495 | -0.220373 |
| 15     | 6             | H           | -1.500655 | 0.931059  | -0.344922 |
| 16     | 1             | H           | -1.898492 | 1.384137  | -1.261199 |
| 17     | 8             | H           | -2.243347 | 1.431210  | 0.725410  |
| 18     | 1             | H           | -1.805914 | 1.117195  | 1.527455  |
| 19     | 8             | H           | 0.957079  | -1.406480 | 1.589055  |
| 20     | 1             | H           | 0.343506  | -1.809337 | 0.961524  |

### 3.2 Experimental data

Table S18: Experimental spectroscopic parameters for the GlcL and GlcL rotationally observed conformers.

|                      | GlcL 1         | GlcL 2         | $\beta$ -f-GlcL 1 | $\beta$ -f-GlcL 2 |
|----------------------|----------------|----------------|-------------------|-------------------|
| A/MHz                | 1202.45777(25) | 1232.31932(30) | 1656.56600(17)    | 1578.36796 (26)   |
| B/MHz                | 844.55185(21)  | 798.73238(19)  | 874.851218(84)    | 806.99379 (12)    |
| C/MHz                | 552.81321(10)  | 502.244063(77) | 782.182652(82)    | 777.96259 (15)    |
| D <sub>J</sub> /kHz  | 0.02548(93)    | 0.01085(90)    | 0.04755(67)       | 0.05715 (79)      |
| D <sub>JK</sub> /kHz | —              | —              | —                 | —                 |
| D <sub>K</sub> /kHz  | 0.1131(66)     | —              | —                 | 0.1790 (53)       |
| d <sub>1</sub> /kHz  | -0.00176(48)   | -0.00340(69)   | 0.1285(46)        | -0.00810 (69)     |
| d <sub>2</sub> /kHz  | —              | —              | -0.00627(35)      | —                 |

### 3.3 Fitted lines

Table S21: Fitted lines and error of  $\beta$ -GlcL 1.

| $J'$ | $Ka'$ | $Kc'$ | $\leftarrow$ | $J''$ | $Ka''$ | $Kc''$ | $\nu$ /MHz | $\Delta\nu$ /MHz |
|------|-------|-------|--------------|-------|--------|--------|------------|------------------|
| 4    | 1     | 4     | $\leftarrow$ | 3     | 1      | 3      | 6428.4163  | -0.0014          |
| 4    | 0     | 4     | $\leftarrow$ | 3     | 0      | 3      | 6553.5961  | -0.0010          |
| 4    | 2     | 3     | $\leftarrow$ | 3     | 2      | 2      | 6622.0738  | 0.0004           |
| 4    | 3     | 2     | $\leftarrow$ | 3     | 3      | 1      | 6642.4852  | 0.0021           |
| 4    | 3     | 1     | $\leftarrow$ | 3     | 3      | 0      | 6644.9176  | -0.0013          |

Table S21 – continued from previous page

| $J'$ | $Ka'$ | $Kc'$ | $\leftarrow$ | $J''$ | $Ka''$ | $Kc''$ | $\nu/\text{MHz}$ | $\Delta\nu/\text{MHz}$ |
|------|-------|-------|--------------|-------|--------|--------|------------------|------------------------|
| 4    | 2     | 2     | $\leftarrow$ | 3     | 2      | 1      | 6696.5816        | -0.0002                |
| 5    | 0     | 5     | $\leftarrow$ | 4     | 1      | 3      | 6761.5777        | 0.0019                 |
| 4    | 1     | 3     | $\leftarrow$ | 3     | 1      | 2      | 6796.6544        | 0.0014                 |
| 4    | 1     | 4     | $\leftarrow$ | 3     | 0      | 3      | 7012.2431        | 0.0012                 |
| 3    | 2     | 2     | $\leftarrow$ | 2     | 1      | 1      | 7316.2330        | -0.0026                |
| 3    | 2     | 1     | $\leftarrow$ | 2     | 1      | 1      | 7354.6822        | 0.0027                 |
| 3    | 2     | 2     | $\leftarrow$ | 2     | 1      | 2      | 7594.2400        | -0.0009                |
| 3    | 2     | 1     | $\leftarrow$ | 2     | 1      | 2      | 7632.6850        | 0.0002                 |
| 5    | 0     | 5     | $\leftarrow$ | 4     | 1      | 4      | 7685.4135        | 0.0007                 |
| 7    | 1     | 7     | $\leftarrow$ | 6     | 2      | 5      | 7695.9722        | -0.0010                |
| 4    | 1     | 3     | $\leftarrow$ | 3     | 0      | 3      | 7936.0769        | -0.0020                |
| 6    | 0     | 6     | $\leftarrow$ | 5     | 1      | 4      | 7998.5808        | -0.0006                |
| 5    | 1     | 5     | $\leftarrow$ | 4     | 1      | 4      | 8023.5282        | 0.0001                 |
| 7    | 2     | 5     | $\leftarrow$ | 6     | 3      | 3      | 8036.0091        | -0.0009                |
| 6    | 1     | 5     | $\leftarrow$ | 5     | 2      | 3      | 8066.3977        | 0.0020                 |
| 5    | 0     | 5     | $\leftarrow$ | 4     | 0      | 4      | 8144.0583        | 0.0006                 |
| 5    | 2     | 4     | $\leftarrow$ | 4     | 2      | 3      | 8267.9087        | 0.0017                 |
| 5    | 3     | 3     | $\leftarrow$ | 4     | 3      | 2      | 8307.7849        | 0.0003                 |
| 5    | 3     | 2     | $\leftarrow$ | 4     | 3      | 1      | 8316.2244        | -0.0024                |
| 6    | 1     | 5     | $\leftarrow$ | 5     | 2      | 4      | 8320.2941        | 0.0000                 |
| 5    | 2     | 3     | $\leftarrow$ | 4     | 2      | 2      | 8408.8520        | -0.0012                |
| 5    | 1     | 4     | $\leftarrow$ | 4     | 1      | 3      | 8478.4219        | 0.0003                 |
| 5    | 1     | 5     | $\leftarrow$ | 4     | 0      | 4      | 8482.1727        | -0.0001                |
| 4    | 2     | 3     | $\leftarrow$ | 3     | 1      | 2      | 8833.2825        | 0.0012                 |
| 4    | 2     | 2     | $\leftarrow$ | 3     | 1      | 2      | 8946.2325        | -0.0010                |
| 3    | 3     | 1     | $\leftarrow$ | 2     | 2      | 0      | 9108.2325        | -0.0010                |
| 3    | 3     | 0     | $\leftarrow$ | 2     | 2      | 0      | 9108.6425        | 0.0011                 |
| 3    | 3     | 1     | $\leftarrow$ | 2     | 2      | 1      | 9115.9925        | -0.0008                |
| 3    | 3     | 0     | $\leftarrow$ | 2     | 2      | 1      | 9116.4025        | 0.0013                 |
| 6    | 0     | 6     | $\leftarrow$ | 5     | 1      | 5      | 9377.3128        | 0.0007                 |
| 4    | 2     | 3     | $\leftarrow$ | 3     | 1      | 3      | 9388.8827        | -0.0003                |
| 4    | 2     | 2     | $\leftarrow$ | 3     | 1      | 3      | 9501.8370        | 0.0017                 |
| 6    | 1     | 6     | $\leftarrow$ | 5     | 1      | 5      | 9612.5208        | -0.0008                |
| 6    | 0     | 6     | $\leftarrow$ | 5     | 0      | 5      | 9715.4270        | -0.0002                |
| 7    | 1     | 6     | $\leftarrow$ | 6     | 2      | 4      | 9728.9978        | 0.0053                 |
| 5    | 1     | 4     | $\leftarrow$ | 4     | 0      | 4      | 9860.9037        | 0.0003                 |
| 6    | 2     | 5     | $\leftarrow$ | 5     | 2      | 4      | 9907.4093        | 0.0006                 |
| 8    | 2     | 6     | $\leftarrow$ | 7     | 3      | 4      | 9930.5766        | -0.0036                |
| 6    | 1     | 6     | $\leftarrow$ | 5     | 0      | 5      | 9950.6359        | -0.0009                |
| 6    | 3     | 4     | $\leftarrow$ | 5     | 3      | 3      | 9974.3290        | 0.0018                 |
| 4    | 1     | 4     | $\leftarrow$ | 3     | 1      | 3      | 6428.4163        | -0.0014                |
| 4    | 0     | 4     | $\leftarrow$ | 3     | 0      | 3      | 6553.5961        | -0.0010                |
| 4    | 2     | 3     | $\leftarrow$ | 3     | 2      | 2      | 6622.0738        | 0.0004                 |
| 4    | 3     | 2     | $\leftarrow$ | 3     | 3      | 1      | 6642.4852        | 0.0021                 |
| 4    | 3     | 1     | $\leftarrow$ | 3     | 3      | 0      | 6644.9176        | -0.0013                |
| 6    | 3     | 3     | $\leftarrow$ | 5     | 3      | 2      | 9996.4318        | -0.0026                |
| 9    | 1     | 9     | $\leftarrow$ | 8     | 2      | 7      | 10114.5030       | -0.0012                |
| 6    | 2     | 4     | $\leftarrow$ | 5     | 2      | 3      | 10133.5086       | -0.0004                |
| 6    | 1     | 5     | $\leftarrow$ | 5     | 1      | 4      | 10146.4079       | 0.0000                 |
| 8    | 0     | 8     | $\leftarrow$ | 7     | 1      | 6      | 10161.4817       | -0.0045                |
| 7    | 1     | 6     | $\leftarrow$ | 6     | 2      | 5      | 10208.9906       | -0.0008                |
| 5    | 2     | 4     | $\leftarrow$ | 4     | 1      | 3      | 10304.5357       | 0.0004                 |
| 5    | 2     | 3     | $\leftarrow$ | 4     | 1      | 3      | 10558.4305       | -0.0032                |
| 4    | 3     | 1     | $\leftarrow$ | 3     | 2      | 1      | 10751.7827       | -0.0001                |

Table S21 – continued from previous page

| $J'$ | $Ka'$ | $Kc'$ | $\leftarrow$ | $J''$ | $Ka''$ | $Kc''$ | $\nu/\text{MHz}$ | $\Delta\nu/\text{MHz}$ |
|------|-------|-------|--------------|-------|--------|--------|------------------|------------------------|
| 4    | 3     | 2     | $\leftarrow$ | 3     | 2      | 2      | 10787.3818       | -0.0012                |
| 4    | 3     | 1     | $\leftarrow$ | 3     | 2      | 2      | 10790.2260       | -0.0007                |
| 7    | 0     | 7     | $\leftarrow$ | 6     | 1      | 6      | 11039.8892       | 0.0009                 |
| 7    | 1     | 7     | $\leftarrow$ | 6     | 1      | 6      | 11195.7031       | -0.0014                |
| 5    | 2     | 4     | $\leftarrow$ | 4     | 1      | 4      | 11228.3726       | 0.0002                 |
| 7    | 0     | 7     | $\leftarrow$ | 6     | 0      | 6      | 11275.1000       | 0.0021                 |
| 7    | 1     | 7     | $\leftarrow$ | 6     | 0      | 6      | 11430.9149       | 0.0008                 |
| 7    | 2     | 6     | $\leftarrow$ | 6     | 2      | 5      | 11539.5361       | 0.0036                 |
| 7    | 3     | 5     | $\leftarrow$ | 6     | 3      | 4      | 11640.8296       | -0.0017                |
| 7    | 3     | 4     | $\leftarrow$ | 6     | 3      | 3      | 11689.0533       | -0.0012                |
| 6    | 2     | 5     | $\leftarrow$ | 5     | 1      | 4      | 11733.5275       | 0.0051                 |
| 7    | 1     | 6     | $\leftarrow$ | 6     | 1      | 5      | 11796.1084       | 0.0024                 |
| 9    | 2     | 7     | $\leftarrow$ | 8     | 3      | 5      | 11826.0393       | -0.0013                |
| 7    | 2     | 5     | $\leftarrow$ | 6     | 2      | 4      | 11861.5089       | -0.0013                |
| 6    | 1     | 5     | $\leftarrow$ | 5     | 0      | 5      | 11863.2549       | 0.0012                 |
| 8    | 1     | 7     | $\leftarrow$ | 7     | 2      | 6      | 12092.6435       | 0.0001                 |
| 6    | 2     | 4     | $\leftarrow$ | 5     | 1      | 4      | 12213.5159       | -0.0053                |
| 5    | 3     | 3     | $\leftarrow$ | 4     | 2      | 2      | 12360.1397       | -0.0023                |
| 5    | 3     | 2     | $\leftarrow$ | 4     | 2      | 2      | 12371.4257       | -0.0022                |
| 4    | 4     | 1     | $\leftarrow$ | 3     | 3      | 0      | 12425.4107       | -0.0045                |
| 4    | 4     | 0     | $\leftarrow$ | 3     | 3      | 0      | 12425.4351       | 0.0020                 |
| 4    | 4     | 1     | $\leftarrow$ | 3     | 3      | 1      | 12425.8224       | -0.0007                |
| 4    | 4     | 0     | $\leftarrow$ | 3     | 3      | 1      | 12425.8466       | 0.0057                 |
| 5    | 3     | 3     | $\leftarrow$ | 4     | 2      | 3      | 12473.0923       | -0.0019                |
| 5    | 3     | 2     | $\leftarrow$ | 4     | 2      | 3      | 12484.3783       | -0.0018                |
| 8    | 0     | 8     | $\leftarrow$ | 7     | 1      | 7      | 12674.5048       | 0.0004                 |
| 8    | 1     | 8     | $\leftarrow$ | 7     | 1      | 7      | 12773.7943       | 0.0005                 |
| 8    | 0     | 8     | $\leftarrow$ | 7     | 0      | 7      | 12830.3222       | 0.0015                 |
| 8    | 1     | 8     | $\leftarrow$ | 7     | 0      | 7      | 12929.6088       | -0.0011                |
| 6    | 2     | 5     | $\leftarrow$ | 5     | 1      | 5      | 13112.2564       | 0.0034                 |
| 7    | 2     | 6     | $\leftarrow$ | 6     | 1      | 5      | 13126.6510       | 0.0040                 |
| 8    | 2     | 7     | $\leftarrow$ | 7     | 2      | 6      | 13163.4637       | 0.0052                 |
| 8    | 3     | 6     | $\leftarrow$ | 7     | 3      | 5      | 13305.6164       | 0.0004                 |
| 8    | 3     | 5     | $\leftarrow$ | 7     | 3      | 4      | 13397.3919       | -0.0040                |
| 8    | 1     | 7     | $\leftarrow$ | 7     | 1      | 6      | 13423.1877       | 0.0033                 |
| 8    | 2     | 6     | $\leftarrow$ | 7     | 2      | 5      | 13583.6234       | -0.0013                |
| 6    | 3     | 4     | $\leftarrow$ | 5     | 2      | 3      | 13925.6188       | 0.0028                 |
| 7    | 2     | 5     | $\leftarrow$ | 6     | 1      | 5      | 13928.6160       | -0.0076                |
| 7    | 1     | 6     | $\leftarrow$ | 6     | 0      | 6      | 13943.9338       | 0.0015                 |
| 9    | 1     | 8     | $\leftarrow$ | 8     | 2      | 7      | 13954.2532       | 0.0022                 |
| 6    | 3     | 3     | $\leftarrow$ | 5     | 2      | 3      | 13959.0069       | -0.0023                |
| 5    | 4     | 2     | $\leftarrow$ | 4     | 3      | 1      | 14082.8544       | -0.0004                |
| 5    | 4     | 1     | $\leftarrow$ | 4     | 3      | 1      | 14083.0137       | -0.0006                |
| 5    | 4     | 2     | $\leftarrow$ | 4     | 3      | 2      | 14085.6982       | -0.0002                |
| 5    | 4     | 1     | $\leftarrow$ | 4     | 3      | 2      | 14085.8598       | 0.0018                 |

Table S22: Fitted lines and error of  $\beta\text{-GlcuL 2}$ 

| $J'$ | $Ka'$ | $Kc'$ | $\leftarrow$ | $J''$ | $Ka''$ | $Kc''$ | $\nu/\text{MHz}$ | $\Delta\nu/\text{MHz}$ |
|------|-------|-------|--------------|-------|--------|--------|------------------|------------------------|
| 4    | 1     | 4     | $\leftarrow$ | 3     | 1      | 3      | 6280.1821        | 0.0001                 |
| 4    | 0     | 4     | $\leftarrow$ | 3     | 0      | 3      | 6331.8069        | -0.0002                |
| 4    | 2     | 3     | $\leftarrow$ | 3     | 2      | 2      | 6339.1800        | 0.0003                 |
| 4    | 1     | 3     | $\leftarrow$ | 3     | 1      | 2      | 6396.2190        | -0.0001                |



Table S22 – continued from previous page

| $J'$ | $Ka'$ | $Kc'$ | ← | $J''$ | $Ka''$ | $Kc''$ | $\nu/\text{MHz}$ | $\Delta\nu/\text{MHz}$ |
|------|-------|-------|---|-------|--------|--------|------------------|------------------------|
| 3    | 2     | 1     | ← | 2     | 1      | 1      | 7072.9910        | -0.0036                |
| 3    | 2     | 2     | ← | 2     | 1      | 2      | 7156.0689        | -0.0024                |
| 4    | 1     | 3     | ← | 3     | 0      | 3      | 7272.7046        | -0.0012                |
| 5    | 1     | 5     | ← | 4     | 1      | 4      | 7848.8051        | 0.0018                 |
| 5    | 0     | 5     | ← | 4     | 0      | 4      | 7908.8555        | -0.0003                |
| 5    | 2     | 4     | ← | 4     | 2      | 3      | 7922.9604        | 0.0008                 |
| 5    | 4     | 2     | ← | 4     | 4      | 1      | 7926.5140        | 0.0025                 |
| 5    | 4     | 1     | ← | 4     | 4      | 0      | 7926.5140        | 0.0009                 |
| 5    | 3     | 3     | ← | 4     | 3      | 2      | 7927.3592        | 0.0016                 |
| 5    | 3     | 2     | ← | 4     | 3      | 1      | 7927.6488        | -0.0008                |
| 5    | 2     | 3     | ← | 4     | 2      | 2      | 7938.8579        | 0.0024                 |
| 5    | 1     | 4     | ← | 4     | 1      | 3      | 7993.6609        | 0.0017                 |
| 4    | 2     | 2     | ← | 3     | 1      | 2      | 8622.2778        | -0.0020                |
| 5    | 1     | 4     | ← | 4     | 0      | 4      | 8934.5574        | -0.0005                |
| 6    | 1     | 6     | ← | 5     | 1      | 5      | 9416.5475        | -0.0009                |
| 6    | 0     | 6     | ← | 5     | 0      | 5      | 9482.2070        | 0.0011                 |
| 6    | 2     | 5     | ← | 5     | 2      | 4      | 9506.0642        | 0.0000                 |
| 6    | 5     | 2     | ← | 5     | 5      | 1      | 9511.6467        | 0.0006                 |
| 6    | 4     | 3     | ← | 5     | 4      | 2      | 9512.3920        | 0.0059                 |
| 6    | 4     | 2     | ← | 5     | 4      | 1      | 9512.3920        | -0.0012                |
| 6    | 3     | 4     | ← | 5     | 3      | 3      | 9513.7126        | 0.0019                 |
| 6    | 3     | 3     | ← | 5     | 3      | 2      | 9514.4904        | 0.0027                 |
| 6    | 2     | 4     | ← | 5     | 2      | 3      | 9533.5403        | 0.0001                 |
| 6    | 1     | 5     | ← | 5     | 1      | 4      | 9589.9456        | 0.0010                 |
| 5    | 2     | 3     | ← | 4     | 1      | 3      | 10164.9112       | -0.0048                |
| 5    | 2     | 4     | ← | 4     | 1      | 4      | 10427.2064       | -0.0018                |
| 6    | 1     | 5     | ← | 5     | 0      | 5      | 10615.6471       | 0.0005                 |
| 7    | 1     | 7     | ← | 6     | 1      | 6      | 10983.3142       | 0.0015                 |
| 7    | 0     | 7     | ← | 6     | 0      | 6      | 11051.4847       | -0.0010                |
| 7    | 2     | 6     | ← | 6     | 2      | 5      | 11088.3607       | -0.0006                |
| 7    | 5     | 2     | ← | 6     | 5      | 1      | 11097.4101       | 0.0021                 |
| 7    | 5     | 3     | ← | 6     | 5      | 2      | 11097.4101       | 0.0022                 |
| 7    | 4     | 4     | ← | 6     | 4      | 3      | 11098.5655       | -0.0037                |
| 7    | 4     | 3     | ← | 6     | 4      | 2      | 11098.5848       | -0.0084                |
| 7    | 3     | 4     | ← | 6     | 3      | 3      | 11102.1700       | 0.0008                 |
| 7    | 1     | 6     | ← | 6     | 1      | 5      | 11184.7697       | 0.0040                 |
| 6    | 2     | 4     | ← | 5     | 1      | 4      | 11704.7952       | -0.0017                |
| 4    | 4     | 0     | ← | 3     | 3      | 0      | 11841.1234       | 0.0060                 |
| 4    | 4     | 1     | ← | 3     | 3      | 1      | 11841.1354       | 0.0043                 |
| 6    | 2     | 5     | ← | 5     | 1      | 5      | 12084.4615       | -0.0077                |
| 7    | 1     | 6     | ← | 6     | 0      | 6      | 12318.2085       | 0.0020                 |
| 8    | 1     | 8     | ← | 7     | 1      | 7      | 12549.0250       | 0.0006                 |
| 8    | 1     | 8     | ← | 7     | 1      | 7      | 12549.0250       | 0.0006                 |
| 8    | 0     | 8     | ← | 7     | 0      | 7      | 12616.6314       | 0.0000                 |
| 8    | 2     | 7     | ← | 7     | 2      | 6      | 12669.7193       | -0.0021                |
| 8    | 3     | 6     | ← | 7     | 3      | 5      | 12687.4734       | 0.0007                 |
| 8    | 3     | 5     | ← | 7     | 3      | 4      | 12690.9416       | 0.0001                 |
| 8    | 1     | 7     | ← | 7     | 1      | 6      | 12777.7697       | -0.0015                |
| 9    | 1     | 9     | ← | 8     | 1      | 8      | 14113.6512       | 0.0036                 |
| 9    | 0     | 9     | ← | 8     | 0      | 8      | 14177.9294       | -0.0001                |
| 9    | 2     | 8     | ← | 8     | 2      | 7      | 14250.0141       | -0.0056                |
| 9    | 3     | 7     | ← | 8     | 3      | 6      | 14274.7823       | -0.0007                |
| 9    | 3     | 6     | ← | 8     | 3      | 5      | 14281.1000       | 0.0027                 |
| 9    | 2     | 7     | ← | 8     | 2      | 6      | 14336.3793       | 0.0057                 |

Table S22 – continued from previous page

| $J'$ | $Ka'$ | $Kc'$ | $\leftarrow$ | $J''$ | $Ka''$ | $Kc''$ | $\nu/\text{MHz}$ | $\Delta\nu/\text{MHz}$ |
|------|-------|-------|--------------|-------|--------|--------|------------------|------------------------|
| 9    | 1     | 8     | $\leftarrow$ | 8     | 1      | 7      | 14368.5619       | -0.0031                |

Table S19: Fitted lines and error of **GlcL 1**

| $J'$ | $Ka'$ | $Kc'$ | $\leftarrow$ | $J''$ | $Ka''$ | $Kc''$ | $\nu/\text{MHz}$ | $\Delta\nu/\text{MHz}$ |
|------|-------|-------|--------------|-------|--------|--------|------------------|------------------------|
| 6    | 0     | 6     | $\leftarrow$ | 5     | 1      | 5      | 7066.1946        | -0.0001                |
| 6    | 1     | 6     | $\leftarrow$ | 5     | 0      | 5      | 7074.0014        | 0.0000                 |
| 7    | 0     | 7     | $\leftarrow$ | 6     | 1      | 6      | 8174.3452        | -0.0007                |
| 7    | 1     | 7     | $\leftarrow$ | 6     | 0      | 6      | 8176.3717        | -0.0001                |
| 8    | 0     | 8     | $\leftarrow$ | 7     | 1      | 7      | 9280.5206        | -0.0015                |
| 8    | 1     | 8     | $\leftarrow$ | 7     | 0      | 7      | 9281.0253        | -0.0007                |
| 9    | 0     | 9     | $\leftarrow$ | 8     | 1      | 8      | 10386.1985       | -0.0022                |
| 9    | 1     | 9     | $\leftarrow$ | 8     | 0      | 8      | 10386.3232       | 0.0008                 |
| 10   | 0     | 10    | $\leftarrow$ | 9     | 1      | 9      | 11491.7748       | 0.0036                 |
| 10   | 1     | 10    | $\leftarrow$ | 9     | 0      | 9      | 11491.7940       | -0.0057                |
| 11   | 0     | 11    | $\leftarrow$ | 10    | 1      | 10     | 12597.3283       | 0.0035                 |
| 11   | 1     | 11    | $\leftarrow$ | 10    | 0      | 10     | 12597.3283       | -0.0031                |
| 12   | 0     | 12    | $\leftarrow$ | 11    | 1      | 11     | 13702.8805       | 0.0012                 |
| 12   | 1     | 12    | $\leftarrow$ | 11    | 0      | 11     | 13702.8805       | -0.0012                |
| 12   | 1     | 12    | $\leftarrow$ | 11    | 0      | 11     | 13702.8805       | -0.0012                |
| 4    | 2     | 3     | $\leftarrow$ | 3     | 1      | 2      | 6226.6789        | 0.0012                 |
| 5    | 2     | 4     | $\leftarrow$ | 4     | 1      | 3      | 7125.0800        | 0.0002                 |
| 6    | 2     | 5     | $\leftarrow$ | 5     | 1      | 4      | 8070.0227        | 0.0005                 |
| 7    | 2     | 6     | $\leftarrow$ | 6     | 1      | 5      | 9095.2470        | -0.0007                |
| 8    | 2     | 7     | $\leftarrow$ | 7     | 1      | 6      | 10169.7854       | 0.0009                 |
| 9    | 2     | 8     | $\leftarrow$ | 8     | 1      | 7      | 11264.5921       | 0.0008                 |
| 10   | 2     | 9     | $\leftarrow$ | 9     | 1      | 8      | 12366.4192       | 0.0015                 |
| 11   | 2     | 10    | $\leftarrow$ | 10    | 1      | 9      | 13470.5365       | 0.0018                 |
| 5    | 1     | 4     | $\leftarrow$ | 4     | 2      | 3      | 6553.9182        | 0.0058                 |
| 6    | 1     | 5     | $\leftarrow$ | 5     | 2      | 4      | 7838.1946        | 0.0019                 |
| 7    | 1     | 6     | $\leftarrow$ | 6     | 2      | 5      | 9015.3042        | -0.0001                |
| 8    | 1     | 7     | $\leftarrow$ | 7     | 2      | 6      | 10145.0034       | -0.0005                |
| 9    | 1     | 8     | $\leftarrow$ | 8     | 2      | 7      | 11257.4379       | -0.0002                |
| 10   | 1     | 9     | $\leftarrow$ | 9     | 2      | 8      | 12364.4557       | 0.0000                 |
| 6    | 2     | 4     | $\leftarrow$ | 5     | 3      | 3      | 7862.7479        | 0.0030                 |
| 7    | 2     | 5     | $\leftarrow$ | 6     | 3      | 4      | 9474.8829        | -0.0025                |
| 8    | 2     | 6     | $\leftarrow$ | 7     | 3      | 5      | 10853.6964       | -0.0057                |
| 9    | 2     | 7     | $\leftarrow$ | 8     | 3      | 6      | 12077.3967       | -0.0060                |
| 3    | 3     | 1     | $\leftarrow$ | 2     | 2      | 0      | 6655.5723        | -0.0018                |
| 4    | 3     | 2     | $\leftarrow$ | 3     | 2      | 1      | 7836.2223        | 0.0018                 |
| 5    | 3     | 3     | $\leftarrow$ | 4     | 2      | 2      | 8813.1033        | 0.0018                 |
| 6    | 3     | 4     | $\leftarrow$ | 5     | 2      | 3      | 9639.5631        | 0.0020                 |
| 7    | 3     | 5     | $\leftarrow$ | 6     | 2      | 4      | 10417.4181       | -0.0022                |
| 8    | 3     | 6     | $\leftarrow$ | 7     | 2      | 5      | 11266.7447       | 0.0034                 |
| 9    | 3     | 7     | $\leftarrow$ | 8     | 2      | 6      | 12232.3379       | 0.0017                 |
| 10   | 3     | 8     | $\leftarrow$ | 9     | 2      | 7      | 13277.7902       | 0.0013                 |
| 4    | 4     | 1     | $\leftarrow$ | 3     | 3      | 0      | 9114.7426        | -0.0023                |
| 4    | 4     | 0     | $\leftarrow$ | 3     | 3      | 1      | 9156.5062        | -0.0015                |
| 4    | 4     | 0     | $\leftarrow$ | 3     | 3      | 0      | 9122.6153        | -0.0038                |
| 4    | 4     | 1     | $\leftarrow$ | 3     | 3      | 1      | 9148.6331        | -0.0005                |
| 5    | 5     | 1     | $\leftarrow$ | 4     | 4      | 0      | 11536.5773       | -0.0017                |
| 5    | 5     | 0     | $\leftarrow$ | 4     | 4      | 1      | 11546.0972       | -0.0013                |
| 5    | 5     | 0     | $\leftarrow$ | 4     | 4      | 0      | 11538.2228       | -0.0016                |
| 5    | 5     | 1     | $\leftarrow$ | 4     | 4      | 1      | 11544.4515       | -0.0017                |
| 6    | 6     | 1     | $\leftarrow$ | 5     | 5      | 0      | 13945.6354       | -0.0002                |
| 6    | 5     | 1     | $\leftarrow$ | 5     | 4      | 1      | 12949.3082       | 0.0043                 |
| 6    | 5     | 2     | $\leftarrow$ | 5     | 4      | 2      | 12997.7206       | 0.0066                 |

Table S20: Fitted lines and error of **GlcL 2**

| $J'$ | $Ka'$ | $Kc'$ | $\leftarrow$ | $J''$ | $Ka''$ | $Kc''$ | $\nu/\text{MHz}$ | $\Delta\nu/\text{MHz}$ |
|------|-------|-------|--------------|-------|--------|--------|------------------|------------------------|
| 6    | 0     | 6     | $\leftarrow$ | 5     | 1      | 5      | 6486.0850        | -0.0005                |
| 6    | 1     | 6     | $\leftarrow$ | 5     | 0      | 5      | 6501.1138        | 0.0013                 |
| 6    | 1     | 6     | $\leftarrow$ | 5     | 1      | 5      | 6489.5020        | 0.0006                 |
| 6    | 0     | 6     | $\leftarrow$ | 5     | 0      | 5      | 6497.6964        | -0.0002                |
| 6    | 1     | 6     | $\leftarrow$ | 5     | 0      | 5      | 6501.1138        | 0.0013                 |
| 7    | 0     | 7     | $\leftarrow$ | 6     | 1      | 6      | 7495.3973        | 0.0001                 |
| 7    | 1     | 7     | $\leftarrow$ | 6     | 1      | 6      | 7496.3568        | -0.0004                |
| 7    | 0     | 7     | $\leftarrow$ | 6     | 0      | 6      | 7498.8114        | -0.0016                |
| 7    | 1     | 7     | $\leftarrow$ | 6     | 0      | 6      | 7499.7731        | 0.0000                 |
| 8    | 0     | 8     | $\leftarrow$ | 7     | 1      | 7      | 8501.1784        | -0.0032                |
| 8    | 1     | 8     | $\leftarrow$ | 7     | 1      | 7      | 8501.4423        | -0.0004                |
| 8    | 0     | 8     | $\leftarrow$ | 7     | 0      | 7      | 8502.1430        | 0.0013                 |
| 8    | 1     | 8     | $\leftarrow$ | 7     | 0      | 7      | 8502.4022        | -0.0005                |
| 9    | 0     | 9     | $\leftarrow$ | 8     | 1      | 8      | 9505.9426        | -0.0001                |
| 9    | 1     | 9     | $\leftarrow$ | 8     | 1      | 8      | 9506.0120        | 0.0000                 |
| 9    | 0     | 9     | $\leftarrow$ | 8     | 0      | 8      | 9506.2049        | 0.0010                 |
| 9    | 1     | 9     | $\leftarrow$ | 8     | 0      | 8      | 9506.2733        | 0.0002                 |
| 6    | 1     | 5     | $\leftarrow$ | 5     | 2      | 4      | 7247.7438        | 0.0035                 |
| 7    | 1     | 6     | $\leftarrow$ | 6     | 2      | 5      | 8366.0742        | 0.0014                 |
| 8    | 1     | 7     | $\leftarrow$ | 7     | 2      | 6      | 9414.6073        | -0.0030                |
| 6    | 1     | 5     | $\leftarrow$ | 5     | 1      | 4      | 7521.0870        | 0.0020                 |
| 7    | 1     | 6     | $\leftarrow$ | 6     | 1      | 5      | 8476.3841        | -0.0007                |
| 8    | 1     | 7     | $\leftarrow$ | 7     | 1      | 6      | 9453.9735        | -0.0002                |
| 9    | 1     | 8     | $\leftarrow$ | 8     | 1      | 7      | 10446.8545       | 0.0021                 |
| 10   | 1     | 9     | $\leftarrow$ | 9     | 1      | 8      | 11446.5778       | -0.0004                |
| 11   | 1     | 10    | $\leftarrow$ | 10    | 1      | 9      | 12448.9865       | -0.0006                |
| 5    | 2     | 4     | $\leftarrow$ | 4     | 1      | 3      | 6831.8996        | -0.0009                |
| 6    | 2     | 5     | $\leftarrow$ | 5     | 1      | 4      | 7631.3969        | -0.0002                |
| 7    | 2     | 6     | $\leftarrow$ | 6     | 1      | 5      | 8515.7479        | -0.0004                |
| 8    | 2     | 7     | $\leftarrow$ | 7     | 1      | 6      | 9466.9336        | 0.0004                 |
| 9    | 2     | 8     | $\leftarrow$ | 8     | 1      | 7      | 10450.8848       | -0.0012                |
| 10   | 2     | 9     | $\leftarrow$ | 9     | 1      | 8      | 11447.7848       | 0.0023                 |
| 4    | 3     | 2     | $\leftarrow$ | 3     | 2      | 1      | 7859.7478        | 0.0002                 |
| 5    | 3     | 2     | $\leftarrow$ | 4     | 3      | 1      | 7083.8195        | 0.0011                 |
| 6    | 3     | 3     | $\leftarrow$ | 5     | 3      | 2      | 8686.1660        | -0.0027                |

## References

- [1] C. E. Cleeton and N. H. Williams, *Physical Review*, 1934, **45**, 234.
- [2] T. A. Halgren, *J. Comput. Chem.*, 1999, **20**, 720–729.
- [3] W. L. Jorgensen, D. S. Maxwell and J. Tirado-Rives, *Journal of the American Chemical Society*, 1996, **118**, 11225–11236.
- [4] D. McDonald and W. Still, *Tetrahedron Letters*, 1992, **33**, 7743–7746.
- [5] C. Møller and M. S. Plesset, *Phys. Rev.*, 1934, **46**, 618–622.
- [6] W. Y. C. Lee and R. G. Parr, *Phys. Rev. B*, 1988, **37**, 785–789.
- [7] A. D. Becke, *J. Chem. Phys.*, 1993, **98**, 5648–5652.
- [8] A. McLean and G. Chandler, *The Journal of chemical physics*, 1980, **72**, 5639–5648.
- [9] T. Clark, J. Chandrasekhar, G. W. Spitznagel and P. V. R. Schleyer, *Journal of Computational Chemistry*, 1983, **4**, 294–301.
- [10] R. Krishnan, J. S. Binkley, R. Seeger and J. A. Pople, *The Journal of chemical physics*, 1980, **72**, 650–654.
- [11] M. e. Frisch, G. Trucks, H. Schlegel, G. Scuseria, M. Robb, J. Cheeseman, G. Scalmani, V. Barone, G. Petersson, H. Nakatsuji *et al.*, *Gaussian 16, revision C. 01*, 2016.
- [12] T. Balle and W. Flygare, *Review of Scientific Instruments*, 1981, **52**, 33–45.
- [13] U. Andresen, H. Dreizler, J.-U. Grabow and W. Stahl, *Review of scientific instruments*, 1990, **61**, 3694–3699.
- [14] E. J. Cocinero, A. Lesarri, P. Ecija, J.-U. Grabow, J. A. Fernández and F. Castaño, *Physical Chemistry Chemical Physics*, 2010, **12**, 12486–12493.
- [15] W. Caminati and J.-U. Grabow, in *Frontiers and advances in molecular spectroscopy*, Elsevier, 2018, pp. 569–598.
